# Supplementary material for: A novel synthesis method of medium- and long-chain triglyceride lipids from rubber seed oil catalyzed by enzymatic interesterification and its metabolism mechanism
Source: Royal Society of Chemistry journal article supplement (doi:10.1039/d3fo05662g), 2024-01-01
Supplement: d3fo05662g1.pdf [file d3fo05662g1.pdf]

**A Novel Synthesis Method of Medium- and Long-Chain Triglyceride Lipids  
from Rubber Seed Oil Catalyzed by Enzymatic Interesterification and Its  
Metabolism Mechanism**

Jiahao Liu<sup>1</sup>, Yinghui Zheng<sup>1</sup>, Renwei Zhang<sup>1</sup>, Yue Yu<sup>1</sup>, Kai Wu<sup>2, \*</sup>, Li Deng<sup>1, \*</sup> and  
Fang Wang<sup>1</sup>

<sup>1</sup> Beijing Bioprocess Key Laboratory and State Key Laboratory of Chemical  
Resource Engineering, College of Life Science and Technology, Beijing University  
of Chemical Technology (BUCT), Beijing, 100029, PR China

<sup>2</sup> School of Chinese Materia Medica, Beijing University of Chinese Medicine,  
Beijing 102488, PR China

**\* Corresponding author Tel: +86-13466784785;**

E-mail address: dengli@mail.buct.edu.cn (Li Deng), wukaiLX@163.com (K. Wu)

The GC graph of MLCT was shown in Fig.S1, the contents of MLCT yields were calculated by area normalization.

Table S1-6 correspond to the original data of A-B Fig.2, respectively.

Table S7 correspond to the original data of Fig.3.

Table S7-9 correspond to the original data of Fig.4

Table S10 correspond to the original data of Fig.5

Table S11 correspond to the original data of Fig.6.

Table S12 correspond to the original data of Fig.7.

Table S13 correspond to the original data of Fig.8.

**Figure legends:**

**Fig. S1** The GC graph of MLCT.

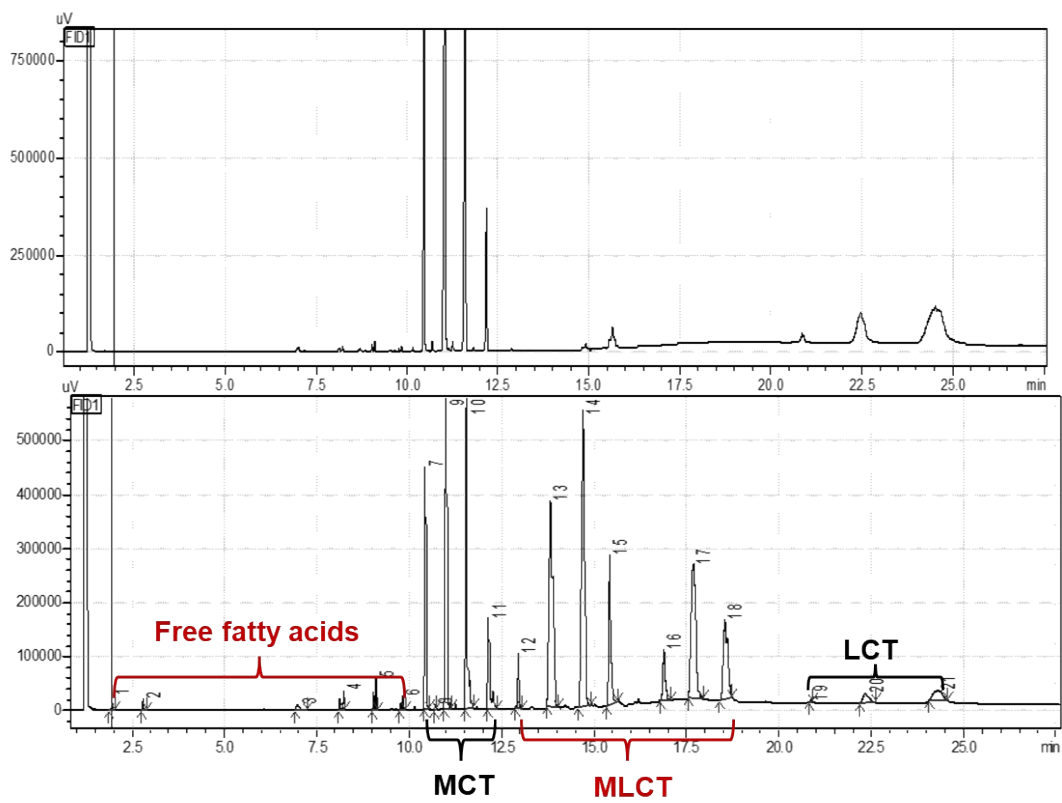

Fig. S1 The GC graph of MLCT

**Table legends:**

**Table S1** The effect of substrate ratio (RSO : MCT) on the yield (%) of MLCT. (n=3)

**Table S2** The effect of lipase on the yield (%) of MLCT (n=3)

**Table S3** The effect of lipase loading on the yield (%) of MLCT (n=3)

**Table S4** The effect of temperature on the yield (%) of MLCT (n=3)

**Table S5** The effect of water content on the yield (%) of MLCT (n=3)

**Table S6** The effect of reusability on the yield (%) of MLCT (n=3)

**Table S7** The hydrolytic properties of MCT/LCT and MLCT during simulated gastrointestinal tract (GIT) digestion. (n=3)

**Table S8** Level of postprandial FFAs in the blood of MCT/LCT(n=3)

**Table S9** Level of postprandial FFAs in the blood of MLCT (n=3)

**Table S10** Effects of different lipids on body weight gain of rats. (n=5)

**Table S11** Analysis of TG, TC, HDL-C, LDL-C levels related to the postprandial blood lipid. (n = 5)

**Table S11** Effect of different lipids on organ indexes changes. (A)TG of livers. (B) TC of livers. (C) TG of kidneys. (D) TC of kidneys (n=5)

**Table S1** The effect of substrate ratio (RSO : MCT) on the yield (%) of MLCT. (n=3)

| The effect of substrate ratio (RSO : MCT) on the yield (%) of MLCT |       |       |       |       |       |       |       |       |       |       |       |       |       |       |       |
|--------------------------------------------------------------------|-------|-------|-------|-------|-------|-------|-------|-------|-------|-------|-------|-------|-------|-------|-------|
| Time                                                               | 1:0.6 |       |       | 1:0.7 |       |       | 1:0.8 |       |       | 1:0.9 |       |       | 1:1   |       |       |
| 0 h                                                                | 0     | 0     | 0     | 0     | 0     | 0     | 0     | 0     | 0     | 0     | 0     | 0     | 0     | 0     | 0     |
| 4 h                                                                | 46.53 | 48.50 | 51.47 | 57.21 | 56.52 | 51.67 | 49.21 | 48.52 | 52.98 | 51.21 | 54.25 | 48.26 | 47.83 | 51.95 | 49.88 |
| 8 h                                                                | 51.20 | 53.11 | 56.60 | 59.26 | 61.85 | 65.32 | 55.90 | 61.14 | 56.99 | 54.12 | 59.25 | 55.25 | 58.25 | 52.12 | 55.25 |
| 12 h                                                               | 65.54 | 66.88 | 60.58 | 72.56 | 70.53 | 65.25 | 65.20 | 62.12 | 68.85 | 61.25 | 63.56 | 67.85 | 60.10 | 64.12 | 56.17 |
| 24 h                                                               | 70.21 | 70.23 | 64.52 | 67.74 | 72.53 | 73.64 | 64.59 | 72.12 | 70.69 | 32.25 | 68.31 | 67.94 | 61.22 | 60.85 | 67.24 |

**Table S2** The effect of lipase on the yield (%) of MLCT (n=3)

| The effect of lipase on the yield (%) of MLCT |             |       |       |               |       |       |          |       |       |             |       |       |
|-----------------------------------------------|-------------|-------|-------|---------------|-------|-------|----------|-------|-------|-------------|-------|-------|
|                                               | Novozym 435 |       |       | Novozym 40086 |       |       | Lipozyme |       |       | Novozym 435 |       |       |
| 24 h                                          | 61.57       | 56.14 | 54.75 | 76.14         | 69.47 | 68.57 | 63.12    | 67.51 | 59.57 | 72.52       | 69.05 | 64.17 |

**Table S3** The effect of lipase loading on the yield (%) of MLCT (n=3)

| The effect of lipase loading on the yield (%) of MLCT |       |       |       |       |       |       |       |       |       |       |       |       |
|-------------------------------------------------------|-------|-------|-------|-------|-------|-------|-------|-------|-------|-------|-------|-------|
|                                                       | 1%    |       |       | 3%    |       |       | 5%    |       |       | 7%    |       |       |
| 0 h                                                   | 0     | 0     | 0     | 0     | 0     | 0     | 0     | 0     | 0     | 0     | 0     | 0     |
| 4 h                                                   | 27.82 | 30.35 | 29.03 | 37.92 | 42.05 | 40.72 | 40.45 | 48.52 | 52.98 | 48.65 | 51.20 | 53.84 |
| 8 h                                                   | 41.01 | 37.85 | 41.75 | 45.15 | 43.35 | 40.85 | 45.12 | 47.81 | 50.45 | 59.25 | 59.31 | 64.26 |
| 12 h                                                  | 44.09 | 43.74 | 47.85 | 53.12 | 58.35 | 54.15 | 65.88 | 61.72 | 68.05 | 67.12 | 70.30 | 73.58 |
| 24 h                                                  | 54.36 | 52.15 | 49.68 | 60.60 | 63.12 | 66.84 | 66.85 | 70.40 | 73.69 | 70.12 | 70.83 | 70.51 |

**Table S4** The effect of temperature on the yield (%) of MLCT (n=3)

| The effect of temperature on the yield (%) of MLCT |       |       |       |       |       |       |       |       |       |       |       |       |
|----------------------------------------------------|-------|-------|-------|-------|-------|-------|-------|-------|-------|-------|-------|-------|
|                                                    | 30°C  |       |       | 40°C  |       |       | 50°C  |       |       | 60°C  |       |       |
| 0h                                                 | 0     | 0     | 0     | 0     | 0     | 0     | 0     | 0     | 0     | 0     | 0     | 0     |
| 2h                                                 | 27.15 | 26.62 | 25.14 | 35.30 | 31.74 | 33.25 | 38.21 | 36.51 | 34.62 | 39.56 | 38.55 | 42.24 |
| 4h                                                 | 32.12 | 33.51 | 35.01 | 39.56 | 43.62 | 40.85 | 42.94 | 42.85 | 46.98 | 46.52 | 44.14 | 48.98 |
| 8h                                                 | 42.12 | 40.15 | 37.13 | 54.12 | 58.35 | 58.62 | 62.14 | 57.32 | 56.39 | 60.25 | 64.85 | 58.74 |
| 12h                                                | 48.41 | 50.58 | 54.68 | 62.12 | 64.23 | 68.84 | 71.42 | 68.08 | 74.74 | 70.42 | 78.68 | 77.05 |



**Table S5** The effect of water content on the yield (%) of MLCT (n=3)

| The effect of water content on the yield (%) of MLCT |                                                     |       |       |       |       |       |       |       |       |       |       |       |       |       |       |
|------------------------------------------------------|-----------------------------------------------------|-------|-------|-------|-------|-------|-------|-------|-------|-------|-------|-------|-------|-------|-------|
| Time                                                 | The effect of water content on the FFAs (%) in MLCT |       |       |       |       |       |       |       |       |       |       |       |       |       |       |
|                                                      | 1%                                                  |       |       | 3%    |       |       | 5%    |       |       | 7%    |       |       | 10%   |       |       |
| 0h                                                   | 0                                                   | 0     | 0     | 0     | 0     | 0     | 0     | 0     | 0     | 0     | 0     | 0     | 0     | 0     | 0     |
| 4h                                                   | 12.87                                               | 12.5  | 12.13 | 11.93 | 11.53 | 11.14 | 13.28 | 13.61 | 13.92 | 14.11 | 14.15 | 13.85 | 17.88 | 23.01 | 20.41 |
| 8h                                                   | 7.52                                                | 7.29  | 7.69  | 9.21  | 9.05  | 9.51  | 15.35 | 14.62 | 15.04 | 23.04 | 21.99 | 22.47 | 17.74 | 23.04 | 20.89 |
| 12h                                                  | 6.41                                                | 6.25  | 6.09  | 7.05  | 7.32  | 7.05  | 7.25  | 7.15  | 6.91  | 16.75 | 17.54 | 17.05 | 16.89 | 21.47 | 22.02 |
| 24h                                                  | 6.52                                                | 6.72  | 6.37  | 6.88  | 7.25  | 7.02  | 7.05  | 6.92  | 6.74  | 17.55 | 16.92 | 16.64 | 17.88 | 23.01 | 20.41 |
| The effect of water content on the yield (%) of MLCT |                                                     |       |       |       |       |       |       |       |       |       |       |       |       |       |       |
| 24h                                                  | 70.14                                               | 71.02 | 78.81 | 72.06 | 69.85 | 78.61 | 75.2  | 74.4  | 66.85 | 65.8  | 74.40 | 70.15 | 67.12 | 71.30 | 62.21 |

**Table S6** The effect of reusability on the yield (%) of MLCT (n=3)

| The effect of reusability on the yield (%) of MLCT |       |       |       |       |       |       |       |       |       |       |       |       |       |      |       |       |       |       |  |
|----------------------------------------------------|-------|-------|-------|-------|-------|-------|-------|-------|-------|-------|-------|-------|-------|------|-------|-------|-------|-------|--|
|                                                    |       | 1     |       |       | 2     |       |       | 3     |       |       | 4     |       |       | 5    |       |       | 6     |       |  |
| 24h                                                | 73.91 | 75.17 | 71.75 | 72.98 | 76.65 | 73.14 | 72.01 | 70.74 | 73.62 | 68.58 | 73.24 | 70.14 | 57.85 | 59.6 | 61.21 | 49.15 | 51.34 | 50.12 |  |

**Table S7** The hydrolytic properties of MCT/LCT and MLCT during simulated gastrointestinal tract (GIT) digestion. (n=3)

|                 | Time | MCFA release from MLCT (%) |        |        | LCFA release from MLCT (%) |        |        | MCFA release from MCT/LCT (%) |        |        | LCFA release from MCT/LCT (%) |        |        |
|-----------------|------|----------------------------|--------|--------|----------------------------|--------|--------|-------------------------------|--------|--------|-------------------------------|--------|--------|
| Mouth           | 30   | 1.480                      | 1.36   | 1.282  | 0.826                      | 0.906  | 0.872  | 0                             | 0      | 0      | 0                             | 0      | 0      |
| Stomach         | 150  | 5.174                      | 5.425  | 5.123  | 2.602                      | 2.384  | 2.544  | 1.207                         | 1.334  | 1.275  | 0.000                         | 0.000  | 0.000  |
|                 | 160  | 10.158                     | 10.564 | 9.950  | 7.021                      | 7.158  | 7.245  | 16.321                        | 18.123 | 17.232 | 4.452                         | 4.096  | 4.306  |
|                 | 170  | 13.556                     | 13.215 | 13.221 | 12.887                     | 13.554 | 14.025 | 26.875                        | 29.856 | 28.331 | 7.865                         | 6.865  | 7.201  |
|                 | 180  | 15.982                     | 15.556 | 15.147 | 19.265                     | 19.341 | 20.524 | 39.052                        | 44.652 | 42.052 | 7.995                         | 7.356  | 7.265  |
|                 | 190  | 25.332                     | 24.126 | 23.214 | 23.875                     | 22.652 | 22.447 | 40.152                        | 44.356 | 42.132 | 8.652                         | 8.265  | 8.064  |
| Small intestine | 200  | 30.154                     | 28.978 | 29.554 | 26.652                     | 27.957 | 25.295 | 41.350                        | 45.826 | 43.421 | 12.785                        | 11.864 | 11.865 |
|                 | 210  | 34.487                     | 35.125 | 33.125 | 31.588                     | 33.104 | 29.952 | 43.685                        | 48.264 | 45.652 | 17.032                        | 15.452 | 16.165 |
|                 | 240  | 40.124                     | 39.218 | 41.568 | 40.862                     | 42.765 | 38.693 | 44.256                        | 48.269 | 46.265 | 29.865                        | 28.532 | 28.365 |
|                 | 270  | 50.002                     | 48.887 | 51.126 | 46.935                     | 49.277 | 44.584 | 45.632                        | 50.435 | 47.765 | 38.889                        | 36.368 | 36.398 |
|                 | 330  | 50.070                     | 48.890 | 51.256 | 47.900                     | 50.190 | 45.410 | 50.263                        | 50.963 | 50.321 | 47.652                        | 46.563 | 47.066 |







**Table S11** Effects of different lipids on body weight gain of rats. (n=5)

| Time | Blank group |                      |        |        |        | MLCT group |                  |        |        |        |
|------|-------------|----------------------|--------|--------|--------|------------|------------------|--------|--------|--------|
|      | 0 week      | 1 week               | 2 week | 3 week | 4 week | 0 week     | 1 week           | 2 week | 3 week | 4 week |
| 1    | 170.5       | 200.5                | 190.7  | 230.5  | 254.1  | 155.5      | 183.5            | 221.5  | 234.5  | 264.2  |
| 2    | 140.5       | 160.5                | 234.5  | 264.5  | 284.1  | 170.6      | 179.6            | 219.5  | 249.8  | 278.5  |
| 3    | 150.2       | 157.2                | 190.5  | 248.5  | 268.2  | 130.6      | 180.6            | 225.6  | 273.5  | 301.2  |
| 4    | 135.2       | 186.6                | 223.5  | 263.4  | 288.2  | 155.5      | 183.5            | 219.8  | 248.8  | 281.4  |
| 5    | 145.2       | 190.5                | 241.2  | 284.1  | 305.5  | 140.2      | 198.2            | 247.5  | 278.1  | 305.1  |
|      |             | <b>MCT/LCT group</b> |        |        |        |            | <b>LCT group</b> |        |        |        |
| 1    | 148.5       | 160.5                | 210.2  | 270.2  | 342.5  | 168.5      | 198.5            | 257.1  | 297.1  | 338.5  |
| 2    | 145.3       | 185.5                | 236.9  | 288.9  | 370.5  | 167.6      | 197.6            | 258.8  | 298.6  | 337.6  |
| 3    | 155.3       | 175.2                | 234.1  | 287.5  | 362.2  | 132.3      | 162.3            | 214.8  | 265.2  | 340.3  |
| 4    | 156.7       | 183.5                | 243.5  | 287.5  | 360.5  | 138.9      | 168.9            | 215.6  | 257.6  | 328.9  |
| 5    | 145.3       | 193.2                | 245.6  | 297.5  | 370.2  | 153.5      | 183.5            | 236.6  | 281.6  | 359.5  |

**Table S12** Analysis of TG, TC, HDL-C, LDL-C levels related to the postprandial blood lipid. (n=5)

| <b>Group</b> | <b>TG</b>    |             |                |            | <b>TC</b>    |             |                |            |
|--------------|--------------|-------------|----------------|------------|--------------|-------------|----------------|------------|
|              | <b>Blank</b> | <b>MLCT</b> | <b>MCT/LCT</b> | <b>LCT</b> | <b>Blank</b> | <b>MLCT</b> | <b>MCT/LCT</b> | <b>LCT</b> |
| 1            | 2.68         | 3.12        | 3.97           | 4.4        | 254.1        | 155.5       | 183.5          | 221.5      |
| 2            | 2.81         | 3.07        | 3.85           | 4          | 284.1        | 170.6       | 179.6          | 219.5      |
| 3            | 2.62         | 2.98        | 3.87           | 4.25       | 268.2        | 130.6       | 180.6          | 225.6      |
| 4            | 2.68         | 3.35        | 3.79           | 4.2        | 288.2        | 155.5       | 183.5          | 219.8      |
| 5            | 2.6          | 3.12        | 4              | 4.58       | 305.5        | 140.2       | 198.2          | 247.5      |

  

| <b>Group</b> | <b>HDL-C</b> |             |                |            | <b>LDL-C</b> |             |                |            |
|--------------|--------------|-------------|----------------|------------|--------------|-------------|----------------|------------|
|              | <b>blank</b> | <b>MLCT</b> | <b>MCT/LCT</b> | <b>LCT</b> | <b>blank</b> | <b>MLCT</b> | <b>MCT/LCT</b> | <b>LCT</b> |
| 1            | 2.58         | 2.68        | 3              | 3.21       | 0.4          | 0.48        | 0.45           | 0.5        |
| 2            | 2.61         | 2.78        | 3.1            | 3.5        | 0.2          | 0.45        | 0.47           | 0.49       |
| 3            | 2.58         | 2.59        | 3.12           | 3.52       | 0.35         | 0.46        | 0.46           | 0.56       |
| 4            | 2.48         | 2.49        | 3.25           | 3.55       | 0.36         | 0.5         | 0.41           | 0.45       |
| 5            | 2.4          | 2.56        | 3.35           | 3.56       | 0.37         | 0.42        | 0.55           | 0.46       |

**Table S13** Effect of different lipids on organ indexes changes. (A)TG of livers. (B) TC of livers. (C) TG of kidneys. (D) TC of kidneys (n=5)

| <b>Liver</b>  |              |             |                |            |              |             |                |            |
|---------------|--------------|-------------|----------------|------------|--------------|-------------|----------------|------------|
| <b>Group</b>  | <b>TG</b>    |             |                |            | <b>TC</b>    |             |                |            |
|               | <b>blank</b> | <b>MLCT</b> | <b>MCT/LCT</b> | <b>LCT</b> | <b>blank</b> | <b>MLCT</b> | <b>MCT/LCT</b> | <b>LCT</b> |
| 1             | 50           | 55          | 115            | 140        | 50           | 55          | 115            | 140        |
| 2             | 54           | 54          | 125            | 130        | 54           | 54          | 125            | 130        |
| 3             | 52           | 53          | 120            | 160        | 52           | 53          | 120            | 160        |
| 4             | 40           | 54          | 110            | 145        | 40           | 54          | 110            | 145        |
| 5             | 55           | 58          | 120            | 142        | 55           | 58          | 120            | 142        |
| <b>Kidney</b> |              |             |                |            |              |             |                |            |
| <b>Group</b>  | <b>TG</b>    |             |                |            | <b>TC</b>    |             |                |            |
|               | <b>blank</b> | <b>MLCT</b> | <b>MCT/LCT</b> | <b>LCT</b> | <b>blank</b> | <b>MLCT</b> | <b>MCT/LCT</b> | <b>LCT</b> |
| 1             | 21           | 29          | 32             | 36         | 55.2         | 60          | 62.5           | 56.8       |
| 2             | 23           | 27          | 34             | 37         | 53.6         | 70          | 55.8           | 57.8       |
| 3             | 25           | 30          | 35             | 30         | 54.9         | 80          | 58.7           | 59.5       |
| 4             | 14           | 25          | 27             | 40         | 51.6         | 50          | 57.5           | 54.8       |
| 5             | 21           | 28          | 29             | 31         | 56.8         | 40          | 59.6           | 56.9       |
